# Supplementary material for: Micro-kinetic modelling of photocatalytic CO2 reduction over undoped and N-doped TiO2
Source: Royal Society of Chemistry journal article supplement (doi:10.1039/c9cy02443c), 2020-01-01
Supplement: c9cy02443c1.pdf [file c9cy02443c1.pdf]

## Supplementary file:

### Micro-kinetic modelling of photocatalytic CO<sub>2</sub> reduction over undoped and N-doped TiO<sub>2</sub>

Andjelika Bjelajac, Drejc Kopač, Antoine Fecant, Eugenie Tavernier, Rada Petrović, Blaž Likozar, Djordje Janačković

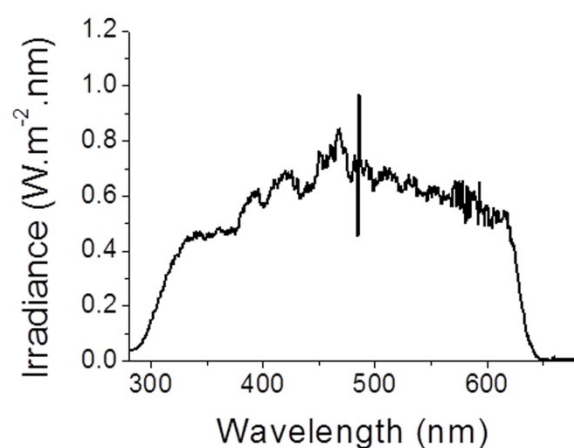

Fig. S1 Total lamp irradiance spectra

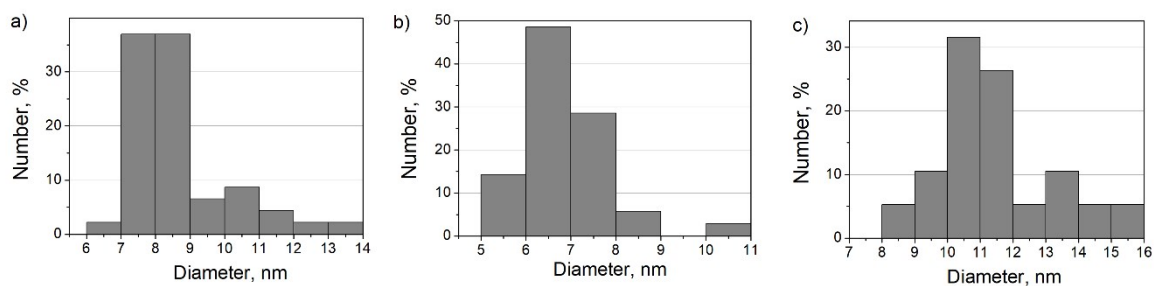

Fig. S3 The particle size distribution of: a) undoped TiO<sub>2</sub>, b) N-TiO<sub>2</sub>(G) and c) N-TiO<sub>2</sub>(P) catalyst calculated by manual measurement of about 30 particles observed from the TEM images.

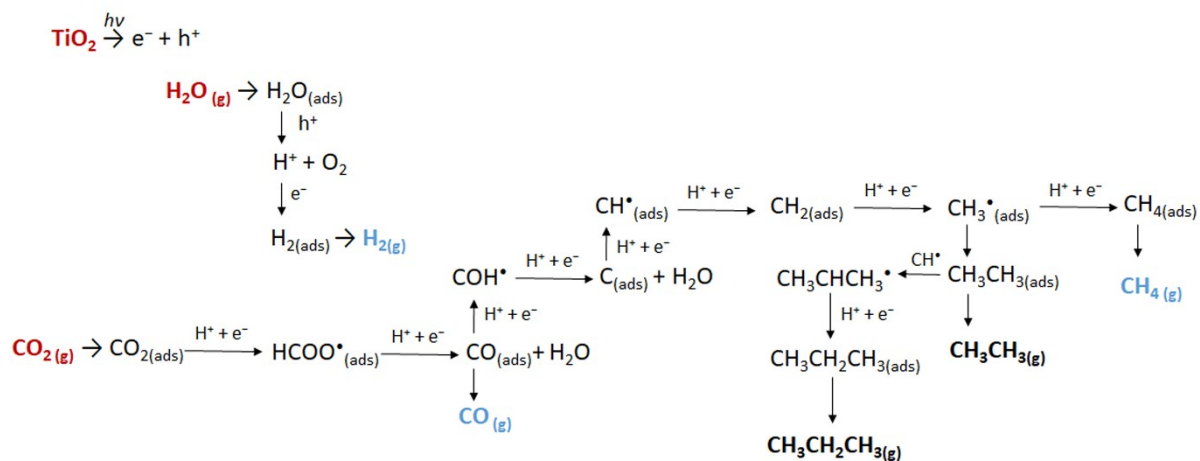

Fig. S3 The reaction pathway scheme. The input reactants TiO<sub>2</sub>, CO<sub>2</sub> and H<sub>2</sub>O are presented in red, whereas final products H<sub>2</sub>, CO and CH<sub>4</sub> are in blue. As CH<sub>3</sub>CH<sub>3</sub> and CH<sub>3</sub>CH<sub>2</sub>CH<sub>3</sub> were produced in negligible amount, they are left in black.
